# Supplementary material for: Pathway-based network modeling finds hidden genes in shRNA screen for regulators of acute lymphoblastic leukemia
Source: Royal Society of Chemistry journal article supplement (doi:10.1039/c6ib00040a), 2016-01-01
Supplement: c6ib00040a1.pdf [file c6ib00040a1.pdf]

Supplementary Figure 1. Percent reduction in mRNA after knockdown as measured via qPCR.
