# Supplementary figures and images for: Pathway-based network modeling finds hidden genes in shRNA screen for regulators of acute lymphoblastic leukemia
Source: Royal Society of Chemistry journal article supplement (doi:10.1039/c6ib00040a), 2016-01-01

## qPCR

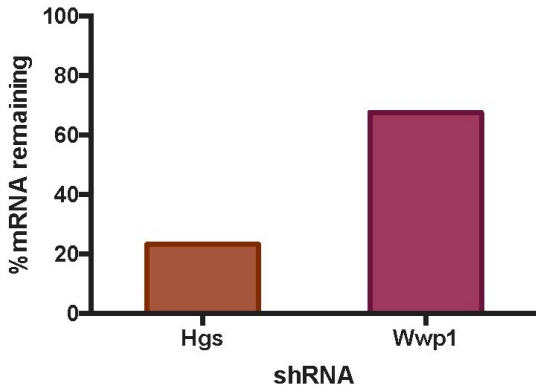

Supplement: c6ib00040a2.pdf [file c6ib00040a2.pdf]
